# Supplementary material for: Chlorhexidine for facility-based umbilical cord care: EN-BIRTH multi-country validation study
Source: PubMed Central journal article supplement (PMC7995704; doi:10.1186/s12884-020-03338-4), 2021-03-26
Supplement: 12884_2020_3338_MOESM1_ESM.pdf [file 12884_2020_3338_MOESM1_ESM.pdf]

**SUPPLEMENT TITLE:**

Every Newborn BIRTH multi-country validation study: informing measurement of coverage and quality of maternal and newborn care

**PAPER TITLE:**

**Chlorhexidine for facility-based umbilical cord care: EN-BIRTH multi-country validation study**

Additional File 1: Chlorhexidine question wording compared with DHS/MICS

|                               | <b>EN-BIRTH</b>                                                                    | <b>DHS-7 Woman's Questionnaire and supplemental modules</b>                                                                                                           | <b>MICS (Questionnaire for individual women, MICS6)</b>                               |
|-------------------------------|------------------------------------------------------------------------------------|-----------------------------------------------------------------------------------------------------------------------------------------------------------------------|---------------------------------------------------------------------------------------|
| Anything applied to cord      | After the cord was cut, was anything applied to the stump of the cord at any time? | NB7 (Newborn care supplemental module). Was anything applied to the stump of the cord at any time?                                                                    | MN30. After the cord was cut and until it fell off, was anything applied to the cord? |
| Chlorhexidine applied to cord | What was applied to the cord? (Show tube)?<br>PROBE: Anything else?                | NB8 (Newborn care supplemental module). What was applied? Anything else?<br>If "chlorhexidine" not reported: CH2. Was chlorhexidine applied to the stump at any time? | MN31. What was applied to the cord?<br>Probe: Anything else?                          |

*DHS: Demographic and Health Surveys; MICS: Multiple Indicator Cluster Surveys*
