# Supplementary material for: Chlorhexidine for facility-based umbilical cord care: EN-BIRTH multi-country validation study
Source: PubMed Central journal article supplement (PMC7995704; doi:10.1186/s12884-020-03338-4), 2021-03-26
Supplement: 12884_2020_3338_MOESM2_ESM.pdf [file 12884_2020_3338_MOESM2_ESM.pdf]

**SUPPLEMENT TITLE:**

Every Newborn BIRTH multi-country validation study: informing measurement of coverage and quality of maternal and newborn care

**PAPER TITLE:**

**Chlorhexidine for facility-based umbilical cord care: EN-BIRTH multi-country validation study**

Additional File 2: EN-BIRTH cord care survey questionnaire used to collect information about cord care and Chlorhexidine cord cleansing

|    | Questions                                                                                                                  | Options                                                                                         | Skip to                    |
|----|----------------------------------------------------------------------------------------------------------------------------|-------------------------------------------------------------------------------------------------|----------------------------|
| Q1 | After the cord was cut, was anything applied to the stump of the cord at any time?                                         | Yes                                                                                             | If Yes go to Q 28a         |
|    |                                                                                                                            | No                                                                                              | If No or Don't Know/Don't  |
|    |                                                                                                                            | Don't know/don't remember                                                                       | Remember, End of Interview |
| Q2 | What was applied to the cord? (Show tube)?<br>PROBE: Anything else?<br>Instructions: Show a tube of chlorhexidine to woman | Chlorhexidine (tube)                                                                            | If No or Don't Know/Don't  |
|    |                                                                                                                            | Other, specify: _____                                                                           | Remember, End of Interview |
|    |                                                                                                                            | Don't know/don't remember                                                                       | Interview                  |
| Q3 | How long after the cord was cut was chlorhexidine first applied?                                                           | Hours    __ __<br>Days        __ __<br>Don't know/don't remember                                |                            |
| Q4 | If chlorhexidine was applied, who applied the treatment within the last 24hours?                                           | Health worker<br>Myself<br>Family member or friend<br>Other: _____<br>Don't know/don't remember |                            |
| Q5 | Were you told the reason why the treatment was being applied to the stump?                                                 | Yes                                                                                             | If Yes go to Q 31a         |
|    |                                                                                                                            | No                                                                                              | If No or Don't Know/Don't  |
|    |                                                                                                                            | Don't know/don't remember                                                                       | Remember, End of Interview |
| Q6 | What was the reason?                                                                                                       | Specify _____<br>Don't know<br>No<br>Don't know/don't remember                                  |                            |
