# Supplementary material for: Chlorhexidine for facility-based umbilical cord care: EN-BIRTH multi-country validation study
Source: PubMed Central journal article supplement (PMC7995704; doi:10.1186/s12884-020-03338-4), 2021-03-26
Supplement: 12884_2020_3338_MOESM3_ESM.pdf [file 12884_2020_3338_MOESM3_ESM.pdf]

**SUPPLEMENT TITLE:**

Every Newborn BIRTH multi-country validation study: informing measurement of coverage and quality of maternal and newborn care

**PAPER TITLE:**

**Chlorhexidine for facility-based umbilical cord care: EN-BIRTH multi-country validation study**

Additional File 3: EN-BIRTH study data collection dates by site and time elapsed between birth and exit survey

| EN-BIRTH study                                                       | Bangladesh<br>Azimpur Tertiary | Bangladesh<br>Kushtia District               | Nepal<br>Pokhara Regional | Tanzania<br>Temeke Regional | Tanzania<br>Muhimbili<br>National | All sites    |
|----------------------------------------------------------------------|--------------------------------|----------------------------------------------|---------------------------|-----------------------------|-----------------------------------|--------------|
| <b>Tablet data collection dates</b>                                  | 17/8/17 to 30/4/18             | 11/7/17 to 30/5/18                           | 17/7/17 to 31/7/18        | 3/7/17 to 30/5/18           | 3/7/17 to 28/2/18                 |              |
| Duration                                                             | 8 months                       | 10 months                                    | 1 year                    | 10 months                   | 7 months                          |              |
| Original register used:                                              | 17/8/17 to 18/10/17            | 25/8/17 to 27/9/17<br>(due to short supply)  | Not applicable            | Not applicable              | Not applicable                    |              |
| Revised register used:                                               | 19/10/17 to 30/4/18            | 11/7/17 to 24/8/17<br>and 28/9/17 to 30/5/18 | Not applicable            | Not applicable              | Not applicable                    |              |
| <b>Register extraction comparison dates to assess biases</b>         |                                |                                              |                           |                             |                                   |              |
| <b>Pre-study</b>                                                     | 1/1/16 to 31/12/16             | 1/1/16 to 31/12/16                           | 1/4/16 to 31/3/17         | 1/1/16 to 31/12/16          | 1/1/16 to 31/12/16                |              |
| Duration                                                             | 12 months                      | 12 months                                    | 12 months                 | 12 months                   | 12 months                         |              |
| <b>During/after-study</b>                                            | 17/8/17 to 17/8/18             | 11/7/17 to 11/7/18                           | 17/7/17 to 17/7/18        | 3/7/17 to 3/7/18            | 3/7/17 to 3/7/18                  |              |
| Duration                                                             | 12 months                      | 12 months                                    | 12 months                 | 12 months                   | 12 months                         |              |
| <b>Time elapsed between delivery and exit survey interview/ days</b> | n (%)                          | n (%)                                        | n (%)                     | n (%)                       | n (%)                             | n (%)        |
| <b>Total</b>                                                         | 2844                           | 2331                                         | 6922                      | 5752                        | 2783                              | 20632        |
| 0-1 day                                                              | 725 (25.5)                     | 1345 (57.7)                                  | 5854 (84.6)               | 5433 (94.5)                 | 1009 (36.3)                       | 14366 (69.6) |
| 2-3 days                                                             | 511 (18)                       | 846 (36.3)                                   | 833 (12)                  | 181 (3.1)                   | 1098 (39.5)                       | 3469 (16.8)  |
| 4+ days                                                              | 1599 (56.2)                    | 127 (5.4)                                    | 154 (2.2)                 | 43 (0.7)                    | 597 (21.5)                        | 2520 (12.2)  |
| Missing                                                              | 9 (0.3)                        | 13 (0.6)                                     | 81 (1.2)                  | 95 (1.7)                    | 79 (2.8)                          | 277 (1.3)    |
| Mean                                                                 | 3.1                            | 1.3                                          | 0.6                       | 0.7                         | 3.2                               | 1.4          |
| Median                                                               | 4.0                            | 0.0                                          | 0.0                       | 0.0                         | 2.0                               | 1.0          |

Sample size was calculated to observe at least 106 observations per intervention per country, based on estimated coverage of intervention during formative research.

Reference: Day LT, Ruysen H, Gordeev VS, et al. "Every Newborn-BIRTH" protocol: observational study validating indicators for coverage and quality of maternal and newborn health care in Bangladesh, Nepal and Tanzania. *Journal of Global Health* 2019; 9(1).
