# Supplementary material for: Chlorhexidine for facility-based umbilical cord care: EN-BIRTH multi-country validation study
Source: PubMed Central journal article supplement (PMC7995704; doi:10.1186/s12884-020-03338-4), 2021-03-26
Supplement: 12884_2020_3338_MOESM6_ESM.pdf [file 12884_2020_3338_MOESM6_ESM.pdf]

**SUPPLEMENT TITLE:**

Every Newborn BIRTH multi-country validation study: informing measurement of coverage and quality of maternal and newborn care

**PAPER TITLE:**

**Chlorhexidine for facility-based umbilical cord care: EN-BIRTH multi-country validation study**

Additional File 6: Individual-level validation in exit-survey report of umbilical cord care practices, EN-BIRTH study (n=12,379)

|                                          | Azimpur (BD)    |           | Kushtia (BD)    |            | Pokhara (NP)    |            | Overall               |              |        |    |        |                |                |
|------------------------------------------|-----------------|-----------|-----------------|------------|-----------------|------------|-----------------------|--------------|--------|----|--------|----------------|----------------|
|                                          | Tertiary        |           | District        |            | Regional        |            | Pooled Random Effects |              |        |    |        |                |                |
|                                          | N(%)            | (CI)      | N(%)            | (CI)       | N(%)            | (CI)       | %                     | (CI)         | Q      | df | p-val. | i <sup>2</sup> | τ <sup>2</sup> |
| <b>Exit-Survey Denominator</b>           | 2826 livebirths |           | 2253 livebirths |            | 6748 livebirths |            | 11827 livebirths      |              |        |    |        |                |                |
| <b>Chlorhexidine Applied to the Cord</b> |                 |           |                 |            |                 |            |                       |              |        |    |        |                |                |
| <b>All modes of birth Combined</b>       |                 |           |                 |            |                 |            |                       |              |        |    |        |                |                |
| Observer Prevalence %                    | 2582<br>(89.3)  |           | 2257<br>(97.9)  |            | 7112<br>(99.4)  |            | 96.6                  | (88.8,99.9)  | 528.1  | 2  | <0.001 | 99.6%          | 0.074          |
| Survey-Reported Prevalence %             | 12 (0.4)        |           | 840<br>(37.3)   |            | 604 (9)         |            | 11.3                  | (0.3,34.6)   | 1757.1 | 2  | <0.001 | 99.8%          | 0.256          |
| Don't know responses %                   | 2189<br>(77.5)  |           | 1251<br>(55.5)  |            | 5355<br>(79.4)  |            | 71.5                  | (57.3,83.7)  | 470.0  | 2  | <0.001 | 99.5%          | 0.068          |
| <b>INCLUDES DON'T KNOW AS NO</b>         |                 |           |                 |            |                 |            |                       |              |        |    |        |                |                |
| >10 Cell Counts                          | No              |           | Yes             |            | No              |            |                       |              |        |    |        |                |                |
| % agreement                              | 11.0            |           | 38.4            |            | 9.5             |            | 18.1                  | (5.5,35.9)   | 876.5  | 2  | <0.001 | 99.7%          | 0.128          |
| Sensitivity                              | 0.5             | 0.2, 0.8  | 37.7            | 35.6, 39.7 | 9.1             | 8.4, 9.8   | 11.5                  | (0.3,34.9)   | 1653.7 | 2  | <0.001 | 99.8%          | 0.021          |
| Specificity                              | 100             | 98.8, 100 | 71.7            | 56.5, 84   | 94.3            | 80.8, 99.3 | 93.0                  | (66.1,100.0) | 49.8   | 2  | <0.001 | 95.9%          | 0.348          |

|                              |            |           |             |            |             |            |      |              |        |   |        |       |       |
|------------------------------|------------|-----------|-------------|------------|-------------|------------|------|--------------|--------|---|--------|-------|-------|
| Positive Predictive Value %  | 100        | 73.5, 100 | 98.5        | 97.4, 99.2 | 99.7        | 98.8, 100  | 99.9 | (98.8,100.0) | 5.5    | 2 | <0.001 | 63.7% | 0.063 |
| Negative Predictive Value %  | 10.6       | 73.5, 100 | 2.4         | 1.6, 3.3   | 0.6         | 0.4, 0.8   | 3.5  | (0.0,12.1)   | 507.7  | 2 | <0.001 | 99.6% | 0.088 |
| AUC                          | 0.5        | 0.5, 0.5  | 0.6         | 0.5, 0.6   | 0.5         | 0.5, 0.6   |      |              |        |   |        |       |       |
| Inflation Factor             | 0.00       |           | 0.38        |            | 0.09        |            |      |              |        |   |        |       |       |
| <b>EXCLUDES DON'T KNOW</b>   |            |           |             |            |             |            |      |              |        |   |        |       |       |
| >10 Cell Counts              | No         |           | No          |            | No          |            |      |              |        |   |        |       |       |
| % agreement                  | 11.5       |           | 83.7        |            | 44.2        |            | 45.8 | (10.0,84.3)  | 1047.2 | 2 | <0.001 | 99.8% | 0.551 |
| Sensitivity                  | 2.1        | 1.1, 3.6  | 84.7        | 82.3, 86.9 | 44.1        | 41.4, 46.8 | 39.7 | 2.7, 86.7    | 1518.0 | 2 | <0.001 | 99.9% | 0.830 |
| Specificity                  | 100        | 94.1, 100 | 23.5        | 6.8, 49.9  | 60          | 14.7, 94.7 | 70   | 3.2, 100     | 56.4   | 2 | <0.001 | 96.5% | 1.521 |
| Positive Predictive Value %  | 100        | 73.5, 100 | 98.5        | 97.4, 99.2 | 99.7        | 98.8, 100  | 99.9 | 98.8, 100    | 5.5    | 2 | <0.001 | 63.7% | 0.005 |
| Negative Predictive Value %  | 9.8        | 7.6, 12.4 | 2.6         | 0.7, 6.6   | 0.4         | 0.1, 1.2   | 3.3  | 0, 12.5      | 86.4   | 2 | <0.001 | 97.7% | 0.095 |
| AUC                          | 0.5        | 0.5, 0.5  | 0.5         | 0.4, 0.7   | 0.5         | 0.3, 0.8   |      |              |        |   |        |       |       |
| Inflation Factor             | 0.02       |           | 0.86        |            | 0.44        |            |      |              |        |   |        |       |       |
| <b>Vaginal Births</b>        |            |           |             |            |             |            |      |              |        |   |        |       |       |
| Observer Prevalence %        | 731 (96.3) |           | 1290 (96.5) |            | 6075 (99.4) |            | 97.7 | (94.4,99.6)  | 78.4   | 2 | <0.001 | 97.4% | 0.023 |
| Survey-Reported Prevalence % | 4 (0.5)    |           | 601 (45.9)  |            | 536 (9.3)   |            | 13.6 | (0.3,41.7)   | 1067.1 | 2 | <0.001 | 99.8% | 0.327 |
| Don't know responses %       | 565 (76.5) |           | 629 (48.1)  |            | 4508 (78.6) |            | 68.5 | (47.9,85.9)  | 450.6  | 2 | <0.001 | 99.5% | 0.138 |

|                                  |      |           |      |            |      |            |      |              |        |   |        |        |       |
|----------------------------------|------|-----------|------|------------|------|------------|------|--------------|--------|---|--------|--------|-------|
| <b>INCLUDES DON'T KNOW AS NO</b> |      |           |      |            |      |            |      |              |        |   |        |        |       |
| >10 Cell Counts                  | No   |           | Yes  |            | No   |            |      |              |        |   |        |        |       |
| % agreement                      | 4.2  |           | 47.8 |            | 9.9  |            | 17.4 | (1.6,4.4)    | 932.9  | 2 | <0.001 | 99.7%  | 0.286 |
| Sensitivity                      | 0.6  | 0.2, 1.4  | 46.9 | 44.1, 49.7 | 9.4  | 8.6, 10.2  | 13.9 | (0.3,42.5)   | 1057.7 | 2 | <0.001 | 99.81% | 0.335 |
| Specificity                      | 100  | 87.2, 100 | 72.7 | 57.2, 85   | 93.8 | 79.2, 99.2 | 91.6 | (70.3,100.0) | 15.3   | 2 | <0.001 | 86.9%  | 0.195 |
| Positive Predictive Value %      | 100  | 39.8, 100 | 98   | 96.5, 99   | 99.6 | 98.7, 100  | 100  | (99.5,100.0) | 6.8    | 2 | <0.001 | 71.0%  | 0.009 |
| Negative Predictive Value %      | 3.7  | 2.4, 5.3  | 4.6  | 3.2, 6.4   | 0.6  | 0.4, 0.8   | 2.5  | (0.3,6.7)    | 75.0   | 2 | <0.001 | 97.3%  | 0.030 |
| AUC                              | 0.5  | 0.5, 0.5  | 0.6  | 0.5, 0.7   | 0.5  | 0.5, 0.6   |      |              |        |   |        |        |       |
| Inflation Factor                 | 0.01 |           | 0.48 |            | 0.09 |            |      |              |        |   |        |        |       |
| <b>EXCLUDES DON'T KNOW</b>       |      |           |      |            |      |            |      |              |        |   |        |        |       |
| >10 Cell Counts                  | No   |           | No   |            | No   |            |      |              |        |   |        |        |       |
| % agreement                      | 5.2  | 2.4, 9.6  | 88.2 | 85.6, 90.6 | 44.4 | 41.6, 47.3 | 44.4 | 7.5, 85.6    | 700.2  | 2 | <0.001 | 99.7%  | 0.630 |
| Sensitivity                      | 2.4  | 0.7, 6    | 89.8 | 87.2, 92   | 44.3 | 41.5, 47.2 | 42.8 | 5, 86.8      | 796.9  | 2 | <0.001 | 99.7%  | 0.731 |
| Specificity                      | 100  | 47.8, 100 | 25   | 7.3, 52.4  | 60   | 14.7, 94.7 | 63.2 | 11.5, 100    | 11.4   | 2 | <0.05  | 82.4%  | 0.610 |
| Positive Predictive Value %      | 100  | 39.8, 100 | 98   | 96.5, 99   | 99.6 | 98.7, 100  | 100  | 99.5, 100    | 6.9    | 2 | <0.05  | 71.0%  | 0.009 |
| Negative Predictive Value %      | 3    | 1, 6.8    | 5.6  | 1.6, 13.8  | 0.4  | 0.1, 1.3   | 2.2  | 0, 6.5       | 13.0   | 2 | <0.05  | 84.6%  | 0.029 |
| AUC                              | 0.5  | 0.5, 0.5  | 0.6  | 0.5, 0.7   | 0.5  | 0.3, 0.8   |      |              |        |   |        |        |       |

|                                      |                |            |               |            |                |           |      |              |       |   |        |       |       |
|--------------------------------------|----------------|------------|---------------|------------|----------------|-----------|------|--------------|-------|---|--------|-------|-------|
| Inflation Factor                     | 0.02           |            | 0.92          |            | 0.44           |           |      |              |       |   |        |       |       |
| <b>Cesarean Births</b>               |                |            |               |            |                |           |      |              |       |   |        |       |       |
| Observer Prevalence %                | 1850<br>(86.8) |            | 967<br>(99.8) |            | 1037<br>(99.2) |           | 97.1 | (85.6,100.0) | 379.5 | 2 | <0.001 | 99.4% | 0.147 |
| Survey-Reported<br>Prevalence %      | 8 (0.4)        |            | 239<br>(25.3) |            | 66 (6.7)       |           | 7.9  | (0.0,27.9)   | 568.7 | 2 | <0.001 | 99.6% | 0.230 |
| Don't know responses %               | 1624<br>(77.9) |            | 622<br>(65.9) |            | 823<br>(83.7)  |           | 76.4 | (66.6,85.0)  | 90.5  | 2 | <0.001 | 97.7% | 0.036 |
| <b>INCLUDES DON'T KNOW<br/>AS NO</b> |                |            |               |            |                |           |      |              |       |   |        |       |       |
| >10 Cell Counts                      | No             |            | No            |            | No             |           |      |              |       |   |        |       |       |
| % agreement                          | 13.4           |            | 25.4          |            | 7.1            |           | 14.5 | (6.7,24.7)   | 123.4 | 2 | <0.001 | 98.3% | 0.051 |
| Sensitivity                          | 0.4            | 0.2, 0.9   | 25.3          | 22.6, 28.2 | 6.8            | 5.2, 8.7  | 8.0  | (0.0,28.1)   | 526.0 | 2 | <0.001 | 99.6% | 0.231 |
| Specificity                          | 100            | 98.7, 100  | 50            | 1.3, 98.7  | 100            | 29.2, 100 | 99.6 | (61.9,100.0) | 6.34  | 2 | <0.001 | 68.4  | 0.368 |
| Positive Predictive Value<br>%       | 100            | 63.1, 100  | 99.6          | 97.7, 100  | 100            | 94, 100   | 100  | (99.8,100.0) | 33.3  | 2 | <0.001 | 0.0%  | 0.0   |
| Negative Predictive Value<br>%       | 13.1           | 11.7, 14.6 | 0.1           | 0, 0.8     | 0.4            | 0.1, 1.1  | 2.5  | (0.0,14.6)   | 349.0 | 2 | <0.001 | 99.4% | 0.167 |
| AUC                                  | 0.5            | 0.5, 0.5   | 0.4           | 0, 0.9     | 0.5            | 0.1, 1.1  |      |              |       |   |        |       |       |
| Inflation Factor                     | 0.00           |            | 0.25          |            | 0.07           |           |      |              |       |   |        |       |       |
| <b>EXCLUDES DON'T KNOW</b>           | No             |            | No            |            | No             |           |      |              |       |   |        |       |       |
| >10 Cell Counts                      |                |            |               |            |                |           |      |              |       |   |        |       |       |
| % agreement                          | 13.9           | 10.9, 17.4 | 74.1          | 69, 78.8   | 42.3           | 34, 50.8  | 42.4 | 7.4, 82.7    | 324.6 | 2 | <0.001 | 99.4% | 0.575 |
| Sensitivity                          | 2              | 0.9, 3.9   | 74.4          | 69.2, 79.1 | 42.3           | 34, 50.8  | 34.7 | 0, 88.4      | 584.8 | 2 | <0.001 | 99.7% | 1.085 |
| Specificity                          | 100            | 93.6, 100  | **            | **         | **             | **        | 34.7 | 0, 88.4      | 584.8 | 2 | <0.001 | 99.7% | 1.085 |

|                             |      |           |      |           |     |         |     |           |     |   |        |       |        |
|-----------------------------|------|-----------|------|-----------|-----|---------|-----|-----------|-----|---|--------|-------|--------|
| Positive Predictive Value % | 100  | 63.1, 100 | 99.6 | 97.7, 100 | 100 | 94, 100 | 100 | 99.8, 100 | 0.3 | 2 | <0.05  | 0.0%  | <0.001 |
| Negative Predictive Value % | 12.4 | 9.5, 15.8 | 0    | 0, 4.4    | 0   | 0, 4.4  | 2.2 | 0, 14.6   | 0.3 | 2 | <0.001 | 95.6% | 0.164  |
| AUC                         | 0.5  | 0.5, 0.5  | 0.4  | 0, 1      | -   | -       |     |           |     |   |        |       |        |
| Inflation Factor            | 0.02 |           | 0.75 |           | -   |         |     |           |     |   |        |       |        |

**Chlorhexidine applied to the Cord within 1 hour of birth**

|                                    |             |           |             |            |             |            |      |              |        |   |        |       |       |
|------------------------------------|-------------|-----------|-------------|------------|-------------|------------|------|--------------|--------|---|--------|-------|-------|
| <b>All modes of birth Combined</b> |             |           |             |            |             |            |      |              |        |   |        |       |       |
| Observer Prevalence %              | 2314 (80)   |           | 2159 (93.6) |            | 7006 (97.9) |            | 91.9 | (78.5,99.1)  | 831.1  | 2 | <0.001 | 99.7% | 0.117 |
| Survey-Reported Prevalence %       | 1 (0)       |           | 588 (26.1)  |            | 316 (4.7)   |            | 6.6  | (0.0,23.7)   | 1336.3 | 2 | <0.001 | 99.8% | 0.194 |
| Don't know responses %             | 2199 (77.8) |           | 1482 (65.8) |            | 5643 (83.6) |            | 76.3 | (65.5,85.6)  | 303.6  | 2 | <0.001 | 99.3% | 0.044 |
| <b>INCLUDES DON'T KNOW AS NO</b>   |             |           |             |            |             |            |      |              |        |   |        |       |       |
| >10 Cell Counts                    | No          |           | Yes         |            | No          |            |      |              |        |   |        |       |       |
| % agreement                        | 19.8        |           | 29.5        |            | 6.5         |            | 17.4 | (5.5,34.2)   | 799.9  | 2 | <0.001 | 99.7% | 0.117 |
| Sensitivity                        | 0           | 0, 0.2    | 26.4        | 24.5, 28.3 | 4.7         | 4.2, 5.2   | 6.7  | (0.0,23.9)   | 1184.4 | 2 | <0.001 | 99.8  | 0.194 |
| Specificity                        | 100         | 99.3, 100 | 76.3        | 68.3, 83.1 | 96.9        | 92.1, 99.1 | 94.7 | (74.3,100.0) | 109.1  | 2 | <0.001 | 98.1% | 0.265 |
| Positive Predictive Value %        | 100         | 2.5, 100  | 94.4        | 92.2, 96.1 | 98.7        | 96.7, 99.6 | 100  | (99.4,100.0) | 11.8   | 2 | <0.001 | 83.0% | 0.024 |

|                                  |             |            |             |            |             |            |      |              |       |   |        |       |       |
|----------------------------------|-------------|------------|-------------|------------|-------------|------------|------|--------------|-------|---|--------|-------|-------|
| Negative Predictive Value %      | 19.8        | 18.3, 21.3 | 6.4         | 5.3, 7.7   | 2           | 1.6, 2.3   | 7.9  | (0.6,22.2)   | 797.6 | 2 | <0.001 | 99.7% | 0.131 |
| AUC                              | 0.5         | 0.5, 0.5   | 0.5         | 0.5, 0.6   | 0.5         | 0.5, 0.5   |      |              |       |   |        |       |       |
| Inflation Factor                 | 0.00        |            | 0.28        |            | 0.05        |            |      |              |       |   |        |       |       |
| <b>Vaginal Births</b>            |             |            |             |            |             |            |      |              |       |   |        |       |       |
| Observer Prevalence %            | 668 (88)    |            | 1229 (91.9) |            | 5983 (97.9) |            | 93.3 | (85.3,98.3)  | 180.2 | 2 | <0.001 | 98.8% | 0.056 |
| Survey-Reported Prevalence %     | 0 (0)       |            | 402 (30.7)  |            | 288 (5)     |            | 7.5  | (0.0,27.4)   | 760.1 | 2 | <0.001 | 99.7% | 0.058 |
| Don't know responses %           | 569 (77)    |            | 818 (62.5)  |            | 4756 (82.9) |            | 74.8 | (60.6,86.6)  | 234.8 | 2 | <0.001 | 99.1  | 0.071 |
| <b>INCLUDES DON'T KNOW AS NO</b> |             |            |             |            |             |            |      |              |       |   |        |       |       |
| >10 Cell Counts                  | No          |            | Yes         |            | No          |            |      |              |       |   |        |       |       |
| % agreement                      | **          |            | 34.5        |            | 6.9         |            | 16.3 | (3.2,36.7)   | 560.3 | 2 | <0.001 | 99.6% | 0.172 |
| Sensitivity                      | **          | **         | 31.2        | 28.6, 34   | 5.1         | 4.5, 5.7   | 7.6  | (0.0,27.8)   | 704.1 | 2 | <0.001 | 99.7% | 0.235 |
| Specificity                      | **          | **         | 72.8        | 63.2, 81.1 | 96.4        | 91, 99     | 93.4 | (72.5,100.0) | 51.3  | 2 | <0.001 | 96.1% | 0.245 |
| Positive Predictive Value %      | **          | **         | 93          | 90.1, 95.3 | 98.6        | 96.5, 99.6 | 95.8 | (94.2,97.2)  | -     | - | <0.001 | -     | -     |
| Negative Predictive Value %      | **          | **         | 8.4         | 6.6, 10.4  | 2           | 1.6, 2.4   | 6.7  | (1.4,15.4)   | 167.4 | 2 | <0.001 | 98.8% | 0.061 |
| AUC                              | **          | **         | 0.5         | 0.5, 0.6   | 0.5         | 0.5, 0.5   |      |              |       |   |        |       |       |
| Inflation Factor                 | **          |            | 0.34        |            | 0.05        |            |      |              |       |   |        |       |       |
| <b>Cesarean Births</b>           |             |            |             |            |             |            |      |              |       |   |        |       |       |
| Observer Prevalence %            | 1646 (77.2) |            | 930 (96)    |            | 1023 (97.9) |            | 92.2 | (75.5,99.8)  | 440.7 | 2 | <0.001 | 99.5% | 0.171 |

|                                     |             |            |             |            |             |           |      |               |        |   |        |       |       |
|-------------------------------------|-------------|------------|-------------|------------|-------------|-----------|------|---------------|--------|---|--------|-------|-------|
| Survey-Reported Prevalence %        | 1 (0)       |            | 186 (19.7)  |            | 26 (2.6)    |           | 4.6  | (0.0,20.5)    | 489.9  | 2 | <0.001 | 99.5% | 0.198 |
| Don't know responses %              | 1630 (78.1) |            | 664 (70.3)  |            | 863 (87.8)  |           | 79.5 | (69.5,87.9)   | 100.9  | 2 | <0.001 | 98.0% | 0.040 |
| <b>INCLUDES DON'T KNOW AS NO</b>    |             |            |             |            |             |           |      |               |        |   |        |       |       |
| >10 Cell Counts                     | No          |            | No          |            | No          |           |      |               |        |   |        |       |       |
| % agreement                         | 22.5        |            | 22.5        |            | 4.1         |           | 15.0 | (4.8,29.5)    | 229.9  | 2 | <0.001 | 99.1% | 0.096 |
| Sensitivity                         | 0.1         | 0, 0.3     | 20          | 17.4, 22.7 | 2.3         | 1.4, 3.5  | 4.5  | (0.0,20.6)    | 439.5  | 2 | <0.001 | 99.5% | 0.203 |
| Specificity                         | 100         | 99.2, 100  | 86.1        | 70.5, 95.3 | 100         | 79.4, 100 | 98.2 | (83.6,100.0)  | 19.1   | 2 | <0.001 | 89.5% | 0.175 |
| Positive Predictive Value %         | 100         | 2.5, 100   | 97.3        | 93.8, 99.1 | 100         | 83.2, 100 | 100  | (100.0,100.0) | 59.2   | 2 | <0.001 | 0.0%  | 0.0   |
| Negative Predictive Value %         | 22.5        | 20.7, 24.3 | 4.1         | 2.8, 5.8   | 1.9         | 1.1, 3    | 7.6  | (0.1,24.6)    | 390.5  | 2 | <0.001 | 99.4% | 0.179 |
| AUC                                 | 0.5         | 0.5, 0.5   | 0.5         | 0.5, 0.6   | 0.5         | 0.5, 0.5  |      |               |        |   |        |       |       |
| Inflation Factor                    | 0.00        |            | 0.21        |            | 0.02        |           |      |               |        |   |        |       |       |
| <b>Anything Applied to the Cord</b> |             |            |             |            |             |           |      |               |        |   |        |       |       |
| <b>All modes of birth Combined</b>  |             |            |             |            |             |           |      |               |        |   |        |       |       |
| Observer Prevalence %               | 2588 (89.4) |            | 2260 (97.9) |            | 7123 (99.3) |           | 96.5 | (89.0,99.9)   | 503.6  | 2 | <0.001 | 99.6% | 0.071 |
| Survey-Reported Prevalence %        | 87 (3.1)    |            | 1393 (61.8) |            | 631 (9.4)   |           | 20.1 | (0.7,55.8)    | 3075.6 | 2 | <0.001 | 99.9% | 0.448 |
| Don't know responses %              | 2115 (74.8) |            | 698 (31)    |            | 5328 (79)   |           | 62.5 | (34.1,86.8)   | 1775.8 | 2 | <0.001 | 99.9% | 0.259 |

|                                  |            |            |             |            |             |            |      |              |        |   |        |       |       |
|----------------------------------|------------|------------|-------------|------------|-------------|------------|------|--------------|--------|---|--------|-------|-------|
| <b>INCLUDES DON'T KNOW AS NO</b> |            |            |             |            |             |            |      |              |        |   |        |       |       |
| >10 Cell Counts                  | No         |            | Yes         |            | No          |            |      |              |        |   |        |       |       |
| % agreement                      | 12.9       |            | 61.6        |            | 9.7         |            | 25.5 | (3.7,57.8)   | 2376.9 | 2 | <0.001 | 99.9% | 0.349 |
| Sensitivity                      | 3.1        | 2.4, 3.8   | 62.1        | 60, 64.1   | 9.4         | 8.7, 10.2  | 20.1 | (0.7,56.3)   | 2969.3 | 2 | <0.001 | 99.9% | 0.458 |
| Specificity                      | 96.9       | 94.3, 98.6 | 38.6        | 24.4, 54.5 | 91.7        | 73, 99     | 80.6 | (35.3,100.0) | 79.71  | 2 | <0.001 | 97.5% | 0.660 |
| Positive Predictive Value %      | 89.7       | 81.3, 95.2 | 98.1        | 97.2, 98.7 | 99.7        | 98.8, 100  | 97.6 | (93.6,99.7)  | 26.3   | 2 | <0.001 | 92.4% | 0.025 |
| Negative Predictive Value %      | 10.4       | 9.3, 11.6  | 2           | 1.2, 3.2   | 0.4         | 0.2, 0.6   | 3.1  | (0.0,12.7)   | 536.4  | 2 | <0.001 | 99.6% | 0.108 |
| AUC                              | 0.5        | 0.5, 0.5   | 0.5         | 0.4, 0.6   | 0.5         | 0.5, 0.6   |      |              |        |   |        |       |       |
| Inflation Factor                 | 0.03       |            | 0.63        |            | 0.09        |            |      |              |        |   |        |       |       |
| <b>Vaginal Births</b>            |            |            |             |            |             |            |      |              |        |   |        |       |       |
| Observer Prevalence %            | 732 (96.3) |            | 1293 (96.7) |            | 6085 (99.3) |            | 97.7 | (94.7,99.5)  | 69.322 | 2 | <0.001 | 97.1% | 0.020 |
| Survey-Reported Prevalence %     | 14 (1.9)   |            | 915 (69.9)  |            | 559 (9.7)   |            | 21.6 | (0.0,65.8)   | 2178.1 | 2 | <0.001 | 99.9% | 0.667 |
| Don't know responses %           | 555 (75.1) |            | 315 (24.1)  |            | 4485 (78.1) |            | 59.7 | (23.9,90.4)  | 1409.5 | 2 | <0.001 | 99.8% | 0.432 |
| <b>INCLUDES DON'T KNOW AS NO</b> |            |            |             |            |             |            |      |              |        |   |        |       |       |
| >10 Cell Counts                  | No         |            | Yes         |            | No          |            |      |              |        |   |        |       |       |
| % agreement                      | 5.2        |            | 69.6        |            | 10.1        |            | 24.1 | (0.1,66.8)   | 1987.9 | 2 | <0.001 | 99.8% | 0.611 |
| Sensitivity                      | 1.8        | 1, 3.1     | 70.7        | 68.1, 73.2 | 9.8         | 9, 10.6    | 21.7 | (0.0,66.3)   | 2142.9 | 2 | <0.001 | 99.9% | 0.678 |
| Specificity                      | 96.2       | 80.4, 99.9 | 38.1        | 23.6, 54.4 | 90.9        | 70.8, 98.9 | 78.4 | (34.6,100.0) | 35.7   | 2 | <0.001 | 94.4% | 0.576 |



|                                  |                |            |               |            |               |           |      |              |        |   |        |       |       |
|----------------------------------|----------------|------------|---------------|------------|---------------|-----------|------|--------------|--------|---|--------|-------|-------|
| Positive Predictive Value %      | 92.9           | 66.1, 99.8 | 97.2          | 95.9, 98.1 | 99.6          | 98.7, 100 | 99.0 | (95.4,100.0) | 17.9   | 2 | <0.001 | 88.2% | 0.021 |
| Negative Predictive Value %      | 3.5            | 2.2, 5.1   | 4.2           | 2.4, 6.7   | 0.4           | 0.2, 0.6  | 2.2  | (0.2,6.3)    | 64.271 | 2 | <0.001 | 96.9  | 0.033 |
| AUC                              | 0.5            | 0.5, 0.5   | 0.5           | 0.5, 0.6   | 0.5           | 0.4, 0.6  |      |              |        |   |        |       |       |
| Inflation Factor                 | 0.02           |            | 0.73          |            | 0.10          |           |      |              |        |   |        |       |       |
| <b>Cesarean Births</b>           |                |            |               |            |               |           |      |              |        |   |        |       |       |
| Observer Prevalence %            | 1855<br>(86.9) |            | 967<br>(99.6) |            | 1038<br>(99)  |           | 96.8 | (85.8,100)   | 337.0  | 2 | <0.001 | 99.4% | 0.131 |
| Survey-Reported Prevalence %     | 73 (3.5)       |            | 478<br>(50.6) |            | 70 (7.1)      |           | 16.4 | (0.3,48.9)   | 979.0  | 2 | <0.001 | 99.8% | 0.397 |
| Don't know responses %           | 1560<br>(74.8) |            | 383<br>(40.6) |            | 819<br>(83.3) |           | 67.5 | (43.1,87.7)  | 470.4  | 2 | <0.001 | 99.5% | 0.190 |
| <b>INCLUDES DON'T KNOW AS NO</b> |                |            |               |            |               |           |      |              |        |   |        |       |       |
| >10 Cell Counts                  | No             |            | No            |            | No            |           |      |              |        |   |        |       |       |
| % agreement                      | 15.6           |            | 50.6          |            | 7.4           |           | 22.2 | (4.6,48.0)   | 557.5  | 2 | <0.001 | 99.4% | 0.234 |
| Sensitivity                      | 3.6            | 2.8, 4.5   | 50.6          | 47.4, 53.9 | 7.2           | 5.5, 9.1  | 16.5 | (0.3,49.6)   | 935.5  | 2 | <0.001 | 99.7% | 0.410 |
| Specificity                      | 97             | 94.2, 98.7 | 50            | 1.3, 98.7  | 100           | 15.8, 100 | 98.5 | (66.9,100.0) | 3.7    | 2 | <0.001 | 47.3% | 0.182 |
| Positive Predictive Value %      | 89             | 79.5, 95.1 | 99.8          | 98.8, 100  | 100           | 94.3, 100 | 98.2 | (90.1,100.0) | 21.7   | 2 | <0.001 | 90.7% | 0.086 |
| Negative Predictive Value %      | 12.9           | 11.5, 14.5 | 0.2           | 0, 1.2     | 0.2           | 0, 0.9    | 2.5  | (0.0,14.7)   | 307.1  | 2 | <0.001 | 99.3% | 0.169 |
| AUC                              | 0.5            | 0.5, 0.5   | 0.5           | 0, 1       | 0.5           | 0.5, 0.5  |      |              |        |   |        |       |       |
| Inflation Factor                 | 0.04           |            | 0.51          |            | 0.07          |           |      |              |        |   |        |       |       |

*n=12,379 observed livebirths, n=11,827 livebirths with survey*

*Red colour: cell count is <5 in 2x2 table; \*\* indicates 2x2 table could not be constructed; Green colour: cell count is ≥5 but <10 in 2x2 table*
