# Supplementary material for: Chlorhexidine for facility-based umbilical cord care: EN-BIRTH multi-country validation study
Source: PubMed Central journal article supplement (PMC7995704; doi:10.1186/s12884-020-03338-4), 2021-03-26
Supplement: 12884_2020_3338_MOESM7_ESM.pdf [file 12884_2020_3338_MOESM7_ESM.pdf]

**SUPPLEMENT TITLE:**

Every Newborn BIRTH multi-country validation study: informing measurement of coverage and quality of maternal and newborn care

**PAPER TITLE:****Chlorhexidine for facility-based umbilical cord care: EN-BIRTH multi-country validation study**

Additional File 7: Exit-survey reported health-worker communication of Chlorhexidine application, EN-BIRTH study (n=11,639)

|                                                             | Azimpur Tertiary |             |             | Kushtia District |            |             | Pokhara Regional |            |             |
|-------------------------------------------------------------|------------------|-------------|-------------|------------------|------------|-------------|------------------|------------|-------------|
|                                                             | Vaginal births   | Caesarean   | Total       | Vaginal births   | Caesarean  | Total       | Vaginal births   | Caesarean  | Total       |
|                                                             | n (%)            | n (%)       | n (%)       | n (%)            | n (%)      | n (%)       | n (%)            | n (%)      | n (%)       |
| <b>The person that applied chlorhexidine</b>                |                  |             |             |                  |            |             |                  |            |             |
| Health worker                                               | 4 (0.5)          | 7 (0.3)     | 11 (0.4)    | 596 (45.5)       | 231 (24.5) | 827 (36.7)  | 533 (9.3)        | 64 (6.5)   | 599 (8.9)   |
| Mother                                                      | 0 (0)            | 0 (0)       | 0 (0)       | 0 (0)            | 1 (0.1)    | 1 (0)       | 0 (0)            | 0 (0)      | 0 (0)       |
| Not applied                                                 | 169 (22.9)       | 454 (21.8)  | 624 (22.1)  | 75 (5.7)         | 82 (8.7)   | 157 (7)     | 679 (11.8)       | 88 (9)     | 767 (11.4)  |
| Don't know                                                  | 565 (76.5)       | 1625 (77.9) | 2190 (77.5) | 634 (48.4)       | 629 (66.6) | 1263 (56.1) | 4511 (78.6)      | 825 (83.9) | 5360 (79.4) |
| <b>Respondents were told the reason for CHX application</b> |                  |             |             |                  |            |             |                  |            |             |
| Yes                                                         | 1 (0.1)          | 2 (0.1)     | 3 (0.1)     | 80 (6.1)         | 47 (5)     | 127 (5.6)   | 73 (1.3)         | 7 (0.7)    | 80 (1.2)    |
| No                                                          | 1 (0.1)          | 2 (0.1)     | 3 (0.1)     | 266 (20.3)       | 110 (11.7) | 376 (16.7)  | 431 (7.5)        | 55 (5.6)   | 488 (7.2)   |
| Not applied                                                 | 169 (22.9)       | 454 (21.8)  | 624 (22.1)  | 75 (5.7)         | 82 (8.7)   | 157 (7)     | 679 (11.8)       | 88 (9)     | 767 (11.4)  |
| Don't know                                                  | 567 (76.9)       | 1628 (78)   | 2195 (77.7) | 884 (67.5)       | 704 (74.6) | 1588 (70.5) | 4540 (79.1)      | 827 (84.1) | 5391 (79.9) |

*\*Total includes vaginal and caesarean*

*n= Number; %=Percentage; CHX: Chlorhexidine*
