# Supplementary material for: Chlorhexidine for facility-based umbilical cord care: EN-BIRTH multi-country validation study
Source: PubMed Central journal article supplement (PMC7995704; doi:10.1186/s12884-020-03338-4), 2021-03-26
Supplement: 12884_2020_3338_MOESM8_ESM.pdf [file 12884_2020_3338_MOESM8_ESM.pdf]

**SUPPLEMENT TITLE:**

Every Newborn BIRTH multi-country validation study: informing measurement of coverage and quality of maternal and newborn care

**PAPER TITLE:**

**Chlorhexidine for facility-based umbilical cord care: EN-BIRTH multi-country validation study**

Additional File 8: Validation register-recorded umbilical cord care practices, EN-BIRTH study (n=10,772)

|                                                     | Azimpur (BD)    |            | Kushtia (BD)    |            | Pokhara (NP)    |            | Overall               |              |        |    |        |                |                |
|-----------------------------------------------------|-----------------|------------|-----------------|------------|-----------------|------------|-----------------------|--------------|--------|----|--------|----------------|----------------|
|                                                     | Tertiary        |            | District        |            | Regional        |            | Pooled Random Effects |              |        |    |        |                |                |
|                                                     | N(%)            | (CI)       | N(%)            | (CI)       | N(%)            | (CI)       | %                     | (CI)         | Q      | df | p-val. | i <sup>2</sup> | τ <sup>2</sup> |
| <b>Register-Recorded Denominator</b>                | 2222 livebirths |            | 1839 livebirths |            | 6711 livebirths |            | 10772 livebirths      |              |        |    |        |                |                |
| <b>All modes of birth Combined</b>                  |                 |            |                 |            |                 |            |                       |              |        |    |        |                |                |
| Observer Prevalence %                               | 2582<br>(89.3)  |            | 2257<br>(97.9)  |            | 7112<br>(99.4)  |            | 99.6                  | (88.8,99.9)  | 528.1  | 2  | <0.001 | 99.6%          | 0.074          |
| Register-Recorded Prevalence %                      | 2185<br>(98.3)  |            | 1796<br>(97.7)  |            | 5282<br>(78.7)  |            | 93.7                  | (76.4,100.0) | 1162.1 | 2  | <0.001 | 99.8%          | 0.199          |
| Not recorded                                        | 13 (0.6)        |            | 41 (2.2)        |            | 1394<br>(20.8)  |            | 5.4                   | (0.0,23.5)   | 1350.2 | 2  | <0.001 | 99.8%          | 0.232          |
| Not readable                                        | 0 (0)           |            | 0 (0)           |            | 4 (0.1)         |            | 0.0                   | (0.0,0.1)    | 2.214  | 2  | <0.001 | 9.6%           | <0.001         |
| <b>INCLUDES NOT RECORDED AND NOT READABLE AS NO</b> |                 |            |                 |            |                 |            |                       |              |        |    |        |                |                |
| >10 Cell Counts                                     | No              |            | No              |            | Yes             |            |                       |              |        |    |        |                |                |
| % agreement                                         | 88.6            |            | 96.4            |            | 78.7            |            | 89.0                  | (76.4,97.1)  | 514.3  | 2  | <0.001 | 99.6%          | 0.088          |
| Sensitivity                                         | 98.3            | 97.7, 98.9 | 97.8            | 97.1, 98.5 | 79              | 78, 80     | 93.8                  | (76.7,100.0) | 1097.8 | 2  | <0.001 | 99.8%          | 0.198          |
| Specificity                                         | 1.8             | 0.5, 4.5   | 6.9             | 0.8, 22.8  | 25              | 12.7, 41.2 | 8.8                   | (0.0,0.280)  | 21.67  | 2  | <0.001 | 90.7%          | 0.171          |



|                                               |             |            |            |            |             |            |      |              |        |   |        |       |        |
|-----------------------------------------------|-------------|------------|------------|------------|-------------|------------|------|--------------|--------|---|--------|-------|--------|
| >10 Cell Counts                               | No          |            | No         |            | No          |            |      |              |        |   |        |       |        |
| % agreement                                   | 94.4        |            | 95.4       |            | 83.9        |            | 91.9 | (82.1,98.0)  | 184.0  | 2 | <0.001 | 98.9% | 0.066  |
| Sensitivity                                   | 98          | 96.4, 99   | 97.8       | 96.8, 98.6 | 84.3        | 83.4, 85.3 | 94.6 | (82.2,99.9)  | 337.8  | 2 | <0.001 | 99.4% | 0.126  |
| Specificity                                   | 4.8         | 0.1, 23.8  | 6.9        | 0.8, 22.8  | 12.5        | 3.5, 29    | 8.3  | (2.8,15.7)   | 83.0   | 2 | 0.660  | 0.0%  | <0.001 |
| Positive Predictive Value %                   | 96.3        | 94.4, 97.7 | 97.5       | 96.4, 98.3 | 99.4        | 99.2, 99.6 | 98.0 | (95.4,99.6)  | 46.9   | 2 | <0.001 | 95.7% | 0.017  |
| Negative Predictive Value %                   | 8.3         | 0.2, 38.5  | 8          | 1, 26      | 0.4         | 0.1, 1.1   | 2.8  | (0.0,15.3)   | 9.3    | 2 | 0.009  | 78.6% | 0.280  |
| AUC                                           | 0.5         | 0.5, 0.6   | 0.5        | 0.5, 0.6   | 0.5         | 0.4, 0.5   |      |              |        |   |        |       |        |
| Inflation Factor                              | 1.02        |            | 1.00       |            | 0.85        |            |      |              |        |   |        |       |        |
| <b>EXCLUDES NOT RECORDED AND NOT READABLE</b> |             |            |            |            |             |            |      |              |        |   |        |       |        |
| >10 Cell Counts                               | No          |            | No         |            | No          |            |      |              |        |   |        |       |        |
| % agreement                                   | 94.4        |            | 95.4       |            | 98.9        |            | 96.6 | (92.5,99.1)  | 68.1   | 2 | <0.001 | 97.0% | 0.025  |
| Sensitivity                                   | 98          | 96.4, 99   | 97.8       | 96.8, 98.6 | 99.4        | 99.2, 99.6 | 98.6 | (96.9,99.6)  | 24.3   | 2 | <0.001 | 91.7% | 0.009  |
| Specificity                                   | 4.8         | 0.1, 23.8  | 6.9        | 0.8, 22.8  | 0           | 0, 12.3    | 2.9  | (0.0,9.5)    | 2.5    | 2 | 0.660  | 21.6% | 0.011  |
| Positive Predictive Value %                   | 96.3        | 94.4, 97.7 | 97.5       | 96.4, 98.3 | 99.4        | 99.2, 99.6 | 98.0 | (95.4,99.6)  | 46.9   | 2 | <0.001 | 95.7% | 0.017  |
| Negative Predictive Value %                   | 8.3         | 0.2, 38.5  | 8          | 1, 26      | 0           | 0, 11.9    | 3.3  | (0.0,13.2)   | 3.5    | 2 | <0.001 | 44.1% | 0.037  |
| AUC                                           | 0.5         | 0.5, 0.6   | 0.5        | 0.5, 0.6   | 0.5         | 0.5, 0.5   |      |              |        |   |        |       |        |
| Inflation Factor                              | 1.02        |            | 1.00       |            | 1.00        |            |      |              |        |   |        |       |        |
| <b>Cesarean Births</b>                        |             |            |            |            |             |            |      |              |        |   |        |       |        |
| Observer Prevalence %                         | 1850 (86.8) |            | 967 (99.8) |            | 1037 (99.2) |            | 97.1 | (85.6,100.0) | 379.5  | 2 | <0.001 | 99.4% | 0.147  |
| Register-Recorded Prevalence %                | 1638 (98.5) |            | 723 (97.7) |            | 318 (39)    |            | 85.5 | (41.5,100.0) | 1421.4 | 2 | <0.001 | 99.8% | 0.715  |

|                                                     |         |            |          |    |            |            |      |              |        |   |        |       |        |
|-----------------------------------------------------|---------|------------|----------|----|------------|------------|------|--------------|--------|---|--------|-------|--------|
| Not recorded                                        | 6 (0.4) |            | 16 (2.2) |    | 495 (60.7) |            | 12.9 | (0.0,58.9)   | 1588.9 | 2 | <0.001 | 99.8% | 0.800  |
| Not readable                                        | 0 (0)   |            | 0 (0)    |    | 1 (0.1)    |            | 0.0  | (0.0,0.1)    | 2.0    | 2 | 0.367  | 0.1%  | <0.001 |
| <b>INCLUDES NOT RECORDED AND NOT READABLE AS NO</b> |         |            |          |    |            |            |      |              |        |   |        |       |        |
| >10 Cell Counts                                     | No      |            | No       |    | No         |            |      |              |        |   |        |       |        |
| % agreement                                         | 86.6    |            | **       |    | 40.2       |            | 79.5 | (43.2,99.3)  | 902.6  | 2 | <0.001 | 99.7% | 0.459  |
| Sensitivity                                         | 98.5    | 97.7, 99.1 | **       | ** | 39.8       | 36.4, 43.4 | 85.8 | (42.4,100.0) | 1322.0 | 2 | <0.001 | 99.8% | 0.702  |
| Specificity                                         | 1.5     | 0.3, 4.2   | **       | ** | 75         | 34.9, 96.8 | 0.6  | (0.0,2.9)    | -      | - | 0.2    | -     | -      |
| Positive Predictive Value %                         | 87.7    | 86, 89.3   | **       | ** | 99.4       | 97.7, 99.9 | 97.7 | (85.1,100.0) | 262.3  | 2 | <0.001 | 99.2% | 0.181  |
| Negative Predictive Value %                         | 12      | 2.5, 31.2  | **       | ** | 1.3        | 0.5, 2.7   | 2.2  | (0.0,10.9)   | 6.4    | 2 | 0.039  | 69.0% | 0.057  |
| AUC                                                 | 0.5     | 0.5, 0.5   | **       | ** | 0.6        | 0.4, 0.7   |      |              |        |   |        |       |        |
| Inflation Factor                                    | 1.12    |            | **       |    | 0.40       |            |      |              |        |   |        |       |        |
| <b>EXCLUDES NOT RECORDED AND NOT READABLE</b>       |         |            |          |    |            |            |      |              |        |   |        |       |        |
| >10 Cell Counts                                     | No      |            | No       |    | No         |            |      |              |        |   |        |       |        |
| % agreement                                         | 86.6    |            | **       |    | 99.1       |            | 95.7 | (85.5,100.0) | 149.4  | 2 | <0.001 | 98.6% | 0.101  |
| Sensitivity                                         | 98.5    | 97.7, 99.1 | **       | ** | 99.7       | 98.2, 100  | 98.7 | (97.6,99.4)  | 5.9    | 2 | 0.051  | 66.3% | 0.003  |
| Specificity                                         | 1.5     | 0.3, 4.2   | **       | ** | 0          | 0, 84.2    | 0.0  | (0.0,0.0)    | -      | - | 1.0    | -     | -      |
| Positive Predictive Value %                         | 87.7    | 86, 89.3   | **       | ** | 99.4       | 97.7, 99.9 | 97.7 | (85.1,100.0) | 262.3  | 2 | <0.001 | 99.2% | 0.181  |
| Negative Predictive Value %                         | 12      | 2.5, 31.2  | **       | ** | 0          | 0, 97.5    | 0.0  | (0.0,11.0)   | 2.63   | 2 | 0.268  | 23.9  | 0.028  |

|                  |      |          |    |    |      |          |  |
|------------------|------|----------|----|----|------|----------|--|
| AUC              | 0.5  | 0.5, 0.5 | ** | ** | 0.5  | 0.5, 0.5 |  |
| Inflation Factor | 1.12 |          | ** |    | 1.00 |          |  |

*Red colour: cell count is <5 in 2x2 table; \*\* indicates 2x2 table could not be constructed; Green colour: cell count is ≥5 but <10 in 2x2 table*
